# Supplementary material
Source: Research Square preprint supplement (doi:10.21203/rs.3.rs-9146467/v1)
Supplement: Supplementary file 1 [file 49e2ca19524bb07a184d8f92.docx]

# QUESTIONNAIRE

**Determinants of risky sexual behaviours among adolescents living with HIV/AIDS attending the ART clinic at Aber Hospital, Oyam District.**

**Target group**: Adolescents aged 10–19 attending the ART clinic at Aber Hospital

| **Section A: Socio-Demographic Information** | **Response Options** |
| --- | --- |
| 1. Age (in years) |  |
| 2. Sex | - Male ☐ Female |
| 3. Education Level | - None ☐ Primary ☐   Secondary ☐ Tertiary |
| 4. Religion | - Catholic ☐ Protestant ☐   Muslim ☐ Other: |
| 5. Marital Status | - Single ☐ Married ☐   Divorced ☐ Other: |
| 6. Duration since HIV Diagnosis | ☐ <12 months ☐ 12–24  months ☐ >24 months |
| 7. Who do you live with? | - Parents ☐ Guardians ☐   Alone ☐ Other: |
| **Section B: Individual Factors** |  |
| 1. Ever heard about HIV transmission? | - Yes ☐ No |
| 2. Can HIV be transmitted through sex? | - Yes ☐ No ☐ Not sure |
| 3. Do condoms prevent HIV/STIs? | - Yes ☐ No |
| 4. Ever had sexual intercourse? | - Yes ☐ No |
| 5. Age at first sex | years |
| 6. Sexual partners in the past 6 months | - None ☐ 1 ☐ 2 or more |
| 7. Used a condom during last sex? | - Yes ☐ No |
| 8. How often do you use condoms? | - Always ☐ Sometimes ☐   Never |
| **Section C: Psychosocial Factors** |  |
| 1. Feel confident expressing sexual boundaries? | - Yes ☐ No |
| 2. Feelings of low self-worth or hopelessness? | - Yes ☐ No |
| 3. Felt anxious or depressed in the past month? | - Yes ☐ No |
| 4. Experienced HIV-related stigma? | - Yes ☐ No |
| 5. Have someone to talk to when stressed? | - Yes ☐ No |
| 6. Received sexual health counselling? | - Yes ☐ No |
| **Section D: Environmental Factors** | **Response Options** |
| 1. Do your peers engage in sexual activity? | - Yes ☐ No |
| 2. Watch sexually explicit media? | - Yes ☐ No |
| 3. Ever used alcohol or drugs? | - Yes ☐ No |
| 4. Access to sexual/reproductive health information? | - Yes ☐ No |
| 5. Distance to health facility | ☐ <5km ☐ 5–10km   - >10km |
| 6. Talk to parents/guardians about sex? | - Yes ☐ No |

| 7. Feel supported by community? | | - Yes ☐ No |
| --- | --- | --- |
| **Section E: Risky Sexual Behaviours** | | |
| Have you ever had sex in exchange for money, drinks, clothes, school fees, or other favors? | - Yes ☐ No | |
| How many sexual partners have you had in the past 6 months? | None ☐ One ☐ Two or  more | |
| Have you ever had sexual intercourse while under the influence of alcohol or drugs? | - Yes ☐ No | |
| Have you ever had a sexual partner who was at least 10 years  older than you? | - Yes ☐ No | |
| Did you use a condom during your last sexual intercourse? | - Yes ☐ No | |
| How often do you use a condom when having sexual  intercourse? | - Always ☐ Sometimes ☐   Never | |

# KEY INFORMANT INTERVIEW GUIDE

**Questions**

1. In your view, what are the main challenges adolescents living with HIV face in managing their sexual health?
2. How do peer relationships influence the sexual behaviour of ALHIV?
3. What role does stigma play in shaping adolescent decision- making around sex?
4. How adequate are the sexual and reproductive health services provided to ALHIV at this facility?
5. Are there any cultural or religious beliefs that affect how adolescents approach sex?
6. What interventions do you think are most effective in promoting safe sexual behaviour among ALHIV?
